# Supplementary material for: CTCF cis-Regulates Trinucleotide Repeat Instability in an Epigenetic Manner: A Novel Basis for Mutational Hot Spot Determination
Source: PLOS journal article supplement (doi:10.1371/journal.pgen.1000257), 2008-11-13

SCA7-CTCF-I-wt (mouse 1)

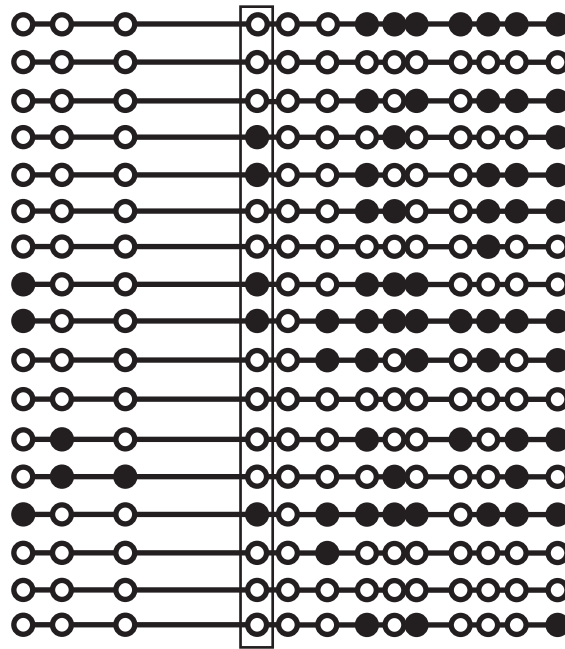

SCA7-CTCF-I-wt (mouse 2)

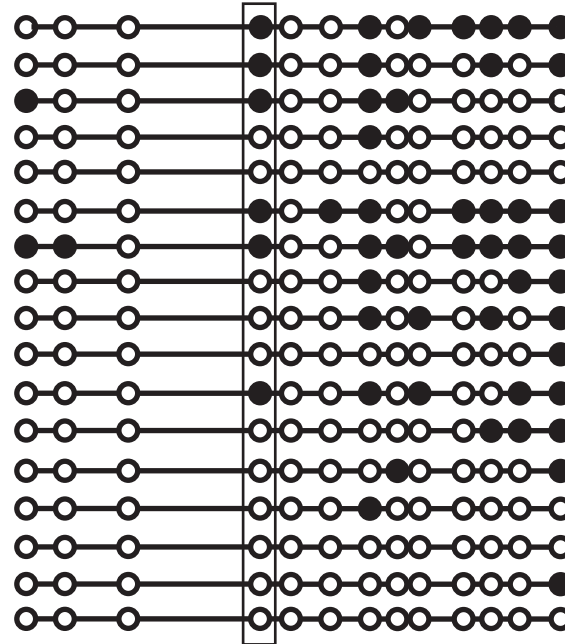

SCA7-CTCF-I-wt (mouse 3)

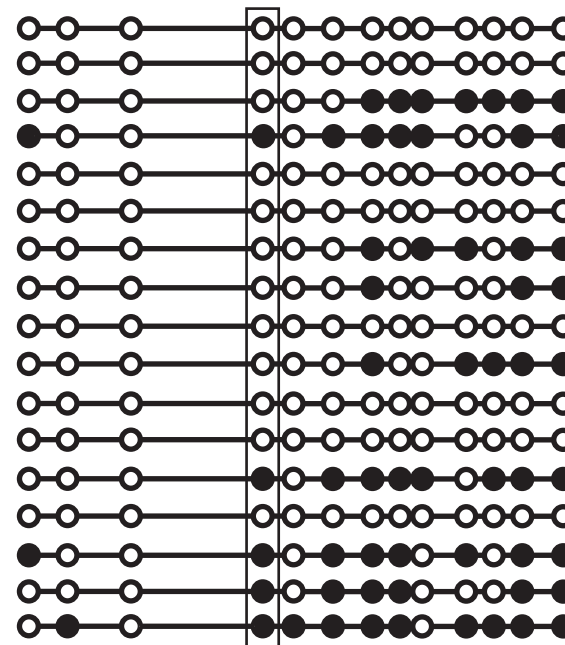

Supplement: S7 (10.1371/journal.pgen.1000257.s007) [file journal.pgen.1000257.s007]
